# Supplementary material for: Clinical Significance of Germline Pathogenic Variants among 51 Cancer Predisposition Genes in an Unselected Cohort of Italian Pancreatic Cancer Patients
Source: MDPI journal article supplement (doi:10.3390/cancers14184447), 2022-09-13
Supplement: s1 [file s1]

Supplementary

# Clinical Significance of Germline Pathogenic Variants among 51 Cancer Predisposition Genes in an Unselected Cohort of Italian Pancreatic Cancer Patients

**Table S1.** List of Likely Pathogenic and Pathogenic Variants.

| Genes | REF SEQ     | Coding                         | Amino Acid Change   | Variant Effect      | ACMG | N° |
|-------|-------------|--------------------------------|---------------------|---------------------|------|----|
| ATM   | NM_000051.3 | c.103C>T                       | p.Arg35Ter          | nonsense            | P    | 1  |
|       |             | c.331+2T>G                     | p.?                 | splicing            | P    | 1  |
|       |             | c.1212_1213delGA               | p.Asn405Ter         | nonsense            | P    | 1  |
|       |             | c.2125-1G>T*                   | p.?                 | splicing            | LP   | 1  |
|       |             | c.2128delA*                    | p.Thr710GlnfsTer25  | frameshiftDeletion  | LP   | 1  |
|       |             | c.2502_2503insA                | p.Val835SerfsTer7   | frameshiftInsertion | P    | 1  |
|       |             | c.3802delG                     | p.Val1268Ter        | nonsense            | P    | 1  |
|       |             | c.3894_3895insT                | p.Ala1299CysfsTer3  | frameshiftInsertion | P    | 1  |
|       |             | c.4451delT                     | p.Met1484ArgfsTer15 | frameshiftDeletion  | P    | 1  |
| BRCA1 | NM_007294.3 | c.6658C>T                      | p.Gln2220Ter        | nonsense            | P    | 1  |
|       |             | c.(80+1_81-1)_(134+1_135-1)del | -                   | deletion            | P    | 1  |
|       |             | c.514delC                      | p.Gln172AsnfsTer62  | frameshiftDeletion  | P    | 1  |
|       |             | c.1380_1381insA                | p.Phe461IlefsTer19  | frameshiftInsertion | P    | 1  |
|       |             | c.1687C>T                      | p.Gln563Ter         | nonsense            | P    | 1  |
|       |             | c.3875_3878delGTCT             | p.Ser1292LeufsTer14 | frameshiftDeletion  | P    | 1  |
|       |             | c.5027_5030delTAAC             | p.Thr1677IlefsTer2  | frameshiftDeletion  | P    | 1  |
| BRCA2 | NM_000059.3 | c.204delA                      | p.Lys68AsnfsTer12   | frameshiftDeletion  | P    | 1  |
|       |             | c.2542A>T                      | p.Lys848Ter         | nonsense            | LP   | 1  |
|       |             | c.3545_3546delTT               | p.Phe1182Ter        | nonsense            | P    | 1  |
|       |             | c.3881T>G                      | p.Leu1294Ter        | nonsense            | P    | 1  |
|       |             | c.5723_5724delTA               | p.Leu1908ArgfsTer2  | frameshiftDeletion  | P    | 1  |
|       |             | c.5796_5797del                 | p.His1932GlnfsTer12 | frameshiftDeletion  | P    | 1  |
|       |             | c.6468_6469delTC               | p.Gln2157IlefsTer18 | frameshiftDeletion  | P    | 1  |
|       |             | c.6591_6592delTG               | p.Glu2198AsnfsTer4  | frameshiftDeletion  | P    | 1  |
|       |             | c.7007+5G>A                    | p.?                 | splicing            | LP   | 1  |
|       |             | c.7180A>T                      | p.Arg2394Ter        | nonsense            | P    | 1  |
|       |             | c.8057T>C                      | p.Leu2686Pro        | missense            | P    | 1  |
|       |             | c.8594T>A                      | p.Leu2865Ter        | nonsense            | P    | 1  |

|        |                 |                                          |                          |                                  |    |    |
|--------|-----------------|------------------------------------------|--------------------------|----------------------------------|----|----|
|        |                 | c.9498delT                               | p.Glu3167Argf-<br>sTer50 | frameshiftDeletion               | P  | 1  |
| CDKN2A | NM_000077<br>.5 | c.-201_-198delinscttt                    | -                        | frameshiftDeletion               | LP | 2  |
|        |                 | c.79G>T                                  | p.Glu27Ter               | nonsense                         | P  | 2  |
|        |                 | c.194T>C                                 | p.Leu65Pro               | missense                         | LP | 1  |
|        |                 | c.202_203delGCinsTT                      | p.Ala68Leu               | missense                         | LP | 1  |
|        |                 | c.249C>A                                 | p.His83Gln               | missense                         | LP | 1  |
|        |                 | c.301G>T                                 | p.Gly101Trp              | missense                         | P  | 11 |
|        |                 | c.377T>A                                 | p.Val126Asp              | missense                         | LP | 1  |
| CHEK2  | NM_007194<br>.4 | c.85C>T                                  | p.Gln29Ter               | nonsense                         | P  | 1  |
|        |                 | c.349A>G                                 | p.Arg117Gly              | missense                         | P  | 1  |
|        |                 | c.475T>C                                 | p.Tyr159His              | missense                         | LP | 2  |
|        |                 | c.483_485delAGA                          | p.Glu161del              | disruptive_in-<br>frame_deletion | LP | 1  |
|        |                 | c.1427C>T                                | p.Thr476Met              | missense                         | LP | 2  |
| COL7A1 | NM_000094<br>.3 | c.7344+2T>C                              | p.?                      | splicing                         | LP | 1  |
|        |                 | c.497_498insA                            | p.Val168Glyf-<br>sTer12  | frameshiftInsertion              | P  | 1  |
|        |                 | c.5047C>T                                | p.Arg1683Ter             | nonsense                         | P  | 1  |
|        |                 | c.1A>G                                   | p.Met1?                  | missense                         | LP | 1  |
|        |                 | c.497_498insA                            | p.Val168Glyf-<br>sTer12  | frameshiftInsertion              | P  | 1  |
| ERCC4  | NM_005236<br>.2 | c.886C>T                                 | p.Gln296Ter              | nonsense                         | LP | 1  |
| FANCA  | NM_000135<br>.3 | c.3391A>G                                | p.Thr1131Ala             | missense                         | P  | 1  |
| FANCC  | NM_000136<br>.2 | c.520C>T                                 | p.Arg174Ter              | nonsense                         | P  | 1  |
| FANCG  | NM_004629<br>.1 | c.601_602delCA                           | p.Gln201Glyf-<br>sTer33  | frameshiftDeletion               | LP | 1  |
| MLH1   | NM_000249<br>.3 | c.1410-2A>G                              | p.?                      | splicing                         | P  | 1  |
| MSH2   | NM_000251<br>.2 | c.528_529delTG                           | p.Cys176Ter              | nonsense                         | P  | 1  |
|        | NM_000251<br>.2 | c.(1386+1_1387-<br>1)_(1510+1_1511-1)del | -                        | deletion                         | P  | 1  |
| NBN    | NM_002485<br>.4 | c.1601_1602insA                          | p.Asn534Lys-<br>fsTer5   | frameshiftInsertion              | LP | 1  |
|        |                 | c.2071-2A>C                              | p.?                      | splicing                         | P  | 1  |
|        |                 | c.2140C>T                                | p.Arg714Ter              | nonsense                         | P  | 1  |
| RAD50  | NM_005732<br>.3 | c.3715C>T                                | p.Arg1239Ter             | nonsense                         | P  | 1  |
| RAD51  | NM_002875<br>.5 | c.220_221dupAT                           | p.Leu75Phef-<br>sTer2    | frameshiftInsertion              | LP | 1  |
| SDHA   | NM_004168<br>.3 | c.553C>T                                 | p.Gln185Ter              | nonsense                         | P  | 1  |
| TP53   | NM_000546<br>.5 | c.365_366delTG                           | p.Val122Aspf-<br>sTer26  | frameshiftDeletion               | P  | 1  |
| RET    | NM_020975<br>.5 | c.1846_1848delGAG                        | p.Glu616del              | nonframeshiftDeletion            | LP | 1  |

**Table S2.** Mutation rate according to age.

| <b>Age</b>            | <b>≤ 50</b> |              | <b>51-60</b> |               | <b>61-70</b> |                | <b>&gt;70</b> |                |
|-----------------------|-------------|--------------|--------------|---------------|--------------|----------------|---------------|----------------|
|                       |             | n=36 (8,53%) |              | n=78 (18,48%) |              | n=126 (29,86%) |               | n=181 (42,89%) |
| <i>ATM</i>            | 1           | 2,78%        | 5            | 6,41%         |              |                | 3             | 1,66%          |
| <i>BRCA1</i>          | 2           | 5,56%        | 1            | 1,28%         | 3            | 2,38%          |               |                |
| <i>BRCA2</i>          | 3           | 8,33%        | 4            | 5,13%         | 6            | 4,76%          |               |                |
| <i>BRCA1/2</i>        | 5           | 13,89%       | 5            | 6,41%         | 9            | 7,14%          |               |                |
| <i>CDKN2A</i>         |             |              | 4            | 5,13%         | 8            | 6,35%          | 7             | 3,87%          |
| <i>CHEK2</i>          |             |              | 3            | 3,85%         | 2            | 1,59%          | 2             | 1,10%          |
| <i>COL7A1</i>         |             |              |              |               | 2            | 1,59%          | 3             | 1,66%          |
| <i>ERCC4</i>          | 1           | 2,78%        |              |               |              |                |               |                |
| <i>FANCA/C/G</i>      |             |              | 1            | 1,28%         |              |                | 2             | 1,10%          |
| <i>MLH1</i>           |             |              |              |               | 1            | 0,79%          |               |                |
| <i>MSH2</i>           | 1           | 2,78%        | 1            | 1,28%         |              |                |               |                |
| <i>NBN</i>            |             |              | 2            | 2,56%         |              |                | 1             | 0,55%          |
| <i>RAD50/51</i>       |             |              |              |               |              |                | 2             | 1,10%          |
| <i>RET1</i>           |             |              |              |               | 1            | 0,79%          |               |                |
| <i>SDHA</i>           |             |              |              |               |              |                | 1             | 0,55%          |
| <i>TP53</i>           |             |              |              |               |              |                | 1             | 0,55%          |
| Overall Mutation Rate | 8           | 22,22%       | 19           | 24,36%        | 22           | 17,46%         | 21            | 11,60%         |
